# Supplementary material
Source: HighWire-hosted journal article supplement (https://jnm.snmjournals.org/highwire/filestream/97855/field_highwire_adjunct_files/0/242180_Supplemental_Data.pdf)

**Supplemental Table 1: Post-PET Management Pathway Category Details (n=382)**

| <b>Intended management before PSMA PET</b> | <b>Intended management after PSMA PET</b> | <b>Change category</b>    | <b>N (%)</b>              |          |
|--------------------------------------------|-------------------------------------------|---------------------------|---------------------------|----------|
| Local                                      | Local                                     | No Change                 | 23 (6%)                   |          |
|                                            | Systemic                                  | Major Change              | 16 (4%)                   |          |
|                                            | Active Surveillance                       | Major Change              | 14 (4%)                   |          |
|                                            | Modify Therapy                            | Minor Change              | 3 (1%)                    |          |
|                                            | Local + Systemic                          | Major Change <sup>1</sup> | 23 (6%)                   |          |
|                                            | „other“                                   | Minor Change              | 5 (1%)                    |          |
|                                            | Systemic                                  | Local                     | Major Change              | 43 (11%) |
|                                            |                                           | Systemic                  | No Change <sup>2</sup>    | 83 (22%) |
|                                            |                                           | Active Surveillance       | Major Change              | 11 (3%)  |
|                                            |                                           | Modify Therapy            | Minor Change              | 1 (0%)   |
|                                            |                                           | Local + Systemic          | Major Change              | 19 (5%)  |
|                                            |                                           | Other                     | Minor Change              | 19 (5%)  |
|                                            | Active Surveillance                       | Local                     | Major Change              | 19 (5%)  |
|                                            |                                           | Systemic                  | Major Change              | 8 (2%)   |
|                                            |                                           | Active Surveillance       | No Change                 | 17 (5%)  |
|                                            |                                           | Modify Therapy            | Minor Change              | 0 (0%)   |
|                                            |                                           | Local + Systemic          | Major Change              | 10 (3%)  |
|                                            |                                           | Other                     | Minor Change              | 1 (0%)   |
|                                            | Other                                     | Local                     | Minor Change              | 7 (2%)   |
|                                            |                                           | Systemic                  | Minor Change              | 5 (1%)   |
|                                            |                                           | Active Surveillance       | Minor Change              | 3 (1%)   |
|                                            |                                           | Modify Therapy            | Minor Change              | 0 (0%)   |
|                                            |                                           | Local + Systemic          | Minor Change              | 3 (1%)   |
|                                            |                                           | Other                     | No Change                 | 2 (1%)   |
|                                            | Local + Systemic                          | Local                     | Major Change <sup>3</sup> | 13 (3%)  |
|                                            |                                           | Systemic                  | Major Change              | 4 (1%)   |
|                                            |                                           | Active Surveillance       | Major Change              | 5 (1%)   |
| Modify Therapy                             |                                           | Minor Change              | 0 (0%)                    |          |
| Local + Systemic                           |                                           | No Change                 | 23 (6%)                   |          |
| Other                                      |                                           | Minor Change              | 2 (1%)                    |          |

<sup>1</sup>Exception: Addition of ADT considered Minor Change (n=22); <sup>2</sup>Exception: Switch to different type of systemic therapy considered Major Change (n=26); <sup>3</sup>Exception: Removal of ADT considered Minor Change (n=13)

## Supplemental Figure 1: Q1 survey

Q1: SURVEY BEFORE PSMA PET/CT

Ga-68 PSMA-11 SCAN BCR

### PATIENT INFORMATION

Last name: \_\_\_\_\_ First Name: \_\_\_\_\_

Date of Birth: \_\_\_\_\_ Medical Record Number: \_\_\_\_\_

**1. Indicate pre <sup>68</sup>Ga-PSMA PET working clinical summary for recurrence location:**

Recurrence is localized in (select all that apply)

- unknown recurrence location
- the prostate bed
- pelvis outside of prostate bed and/or intrapelvic lymph nodes
- extrapelvic soft tissue, lymph nodes and/or organ metastases (non-bone)
- bone

**2. If <sup>68</sup>Ga-PSMA PET was not available, which additional imaging test would you order?**

- |                                                               |                                               |
|---------------------------------------------------------------|-----------------------------------------------|
| <input type="checkbox"/> MRI                                  | <input type="checkbox"/> ProstaScint          |
| <input type="checkbox"/> CT                                   | <input type="checkbox"/> Biopsy, image guided |
| <input type="checkbox"/> FDG/Choline/Acetate/Fluciclovine PET | <input type="checkbox"/> Other: _____         |
| <input type="checkbox"/> Bone scan/Fluoride PET               |                                               |

**3. What would be your next step in management, if you were not to order this study?**

- |                                                           |                                                          |
|-----------------------------------------------------------|----------------------------------------------------------|
| <input type="checkbox"/> Surgery                          | <input type="checkbox"/> Radionuclide therapy (Ra-223)   |
| <input type="checkbox"/> External-beam radiation therapy  | <input type="checkbox"/> Bone targeted therapy           |
| <input type="checkbox"/> ADT for hormone dependent cancer | <input type="checkbox"/> Modify dose of existing therapy |
| <input type="checkbox"/> Abiraterone/Enzalutamide         | <input type="checkbox"/> Active surveillance             |
| <input type="checkbox"/> Chemotherapy                     | <input type="checkbox"/> Other (please describe below)   |

Other: \_\_\_\_\_

Referring Physician Name: \_\_\_\_\_

Date: \_\_\_\_\_ Signature: \_\_\_\_\_

## Supplemental Figure 2: Q2 survey

Q2: SURVEY WITHIN 4 WEEKS AFTER PSMA PET/CT

Ga-68 PSMA-11 SCAN BCR

### PATIENT INFORMATION

Last name: \_\_\_\_\_ First Name: \_\_\_\_\_

Date of Birth: \_\_\_\_\_ Medical Record Number: \_\_\_\_\_

**1. Indicate post <sup>68</sup>Ga-PSMA PET working clinical summary for recurrence location:**

Recurrence is localized in (select all that apply)

- unknown recurrence location
- the prostate bed
- pelvis outside of prostate bed and/or intrapelvic lymph nodes
- extrapelvic soft tissue, lymph nodes and/or organ metastases (non-bone)
- bone

**2. Did the <sup>68</sup>Ga-PSMA PET enable you to avoid any test or procedure?**

- Yes
- No

If yes, which test/procedure was avoided? \_\_\_\_\_

**3. Did the <sup>68</sup>Ga-PSMA PET result in any additional test or procedure?**

- Yes
- No

If yes, which test/procedure was added? \_\_\_\_\_

**4. Did <sup>68</sup>Ga-PSMA PET findings trigger a planned biopsy?**

- Yes
- No

**5. Based on <sup>68</sup>Ga-PSMA PET findings what is your treatment plan? (select all that apply)**

- |                                                           |                                                          |
|-----------------------------------------------------------|----------------------------------------------------------|
| <input type="checkbox"/> Surgery                          | <input type="checkbox"/> Radionuclide therapy (Ra-223)   |
| <input type="checkbox"/> External-beam radiation therapy  | <input type="checkbox"/> Bone targeted therapy           |
| <input type="checkbox"/> ADT for hormone dependent cancer | <input type="checkbox"/> Modify dose of existing therapy |
| <input type="checkbox"/> Abiraterone/Enzalutamide         | <input type="checkbox"/> Active surveillance             |
| <input type="checkbox"/> Chemotherapy                     | <input type="checkbox"/> Other (please describe below)   |

Other: \_\_\_\_\_

Referring Physician Name: \_\_\_\_\_

Date: \_\_\_\_\_ Signature: \_\_\_\_\_

## Supplemental Figure 3: Q3 survey

Q3: SURVEY 3 TO 6 MONTHS AFTER PSMA PET/CT

Ga-68 PSMA-11 SCAN BCR

| PATIENT INFORMATION  |                              |
|----------------------|------------------------------|
| Last name: _____     | First Name: _____            |
| Date of Birth: _____ | Medical Record Number: _____ |

**1. On the post scan questionnaire (questionnaire #2) you indicated an intended treatment management of:**

- |                                                                 |                                                          |
|-----------------------------------------------------------------|----------------------------------------------------------|
| <input type="checkbox"/> Surgery                                | <input type="checkbox"/> Radionuclide therapy (Ra-223)   |
| <input type="checkbox"/> External-beam radiation therapy (EBRT) | <input type="checkbox"/> Bone targeted therapy           |
| <input type="checkbox"/> Modify EBRT planning                   | <input type="checkbox"/> Modify dose of existing therapy |
| <input type="checkbox"/> ADT for hormone dependent cancer       | <input type="checkbox"/> Active surveillance             |
| <input type="checkbox"/> Abiraterone/Enzalutamide               | <input type="checkbox"/> Other (please describe below)   |
| <input type="checkbox"/> Chemotherapy                           |                                                          |

Other: \_\_\_\_\_

**2. Please indicate whether the intended management noted on the post scan questionnaire (questionnaire #2) was implemented:**

- Yes  
 No

If No, please indicate why: \_\_\_\_\_

---

Referring Physician Name: \_\_\_\_\_

Date: \_\_\_\_\_ Signature: \_\_\_\_\_

### Supplemental Figure 4: Intended management change after PSMA PET stratified by PSA

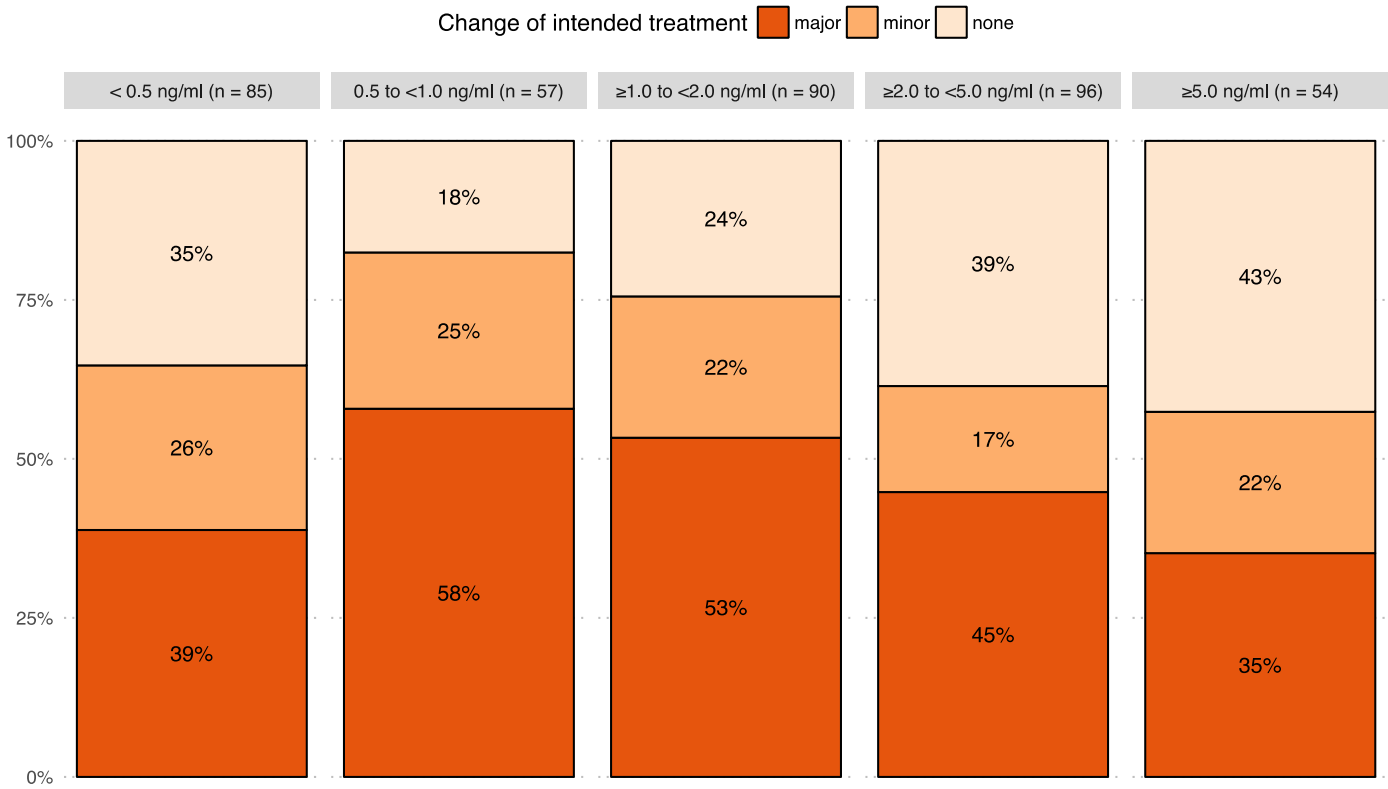

Supplemental Figure 5: Sankey diagram for pre- to post-PET change of intended management (n=382)

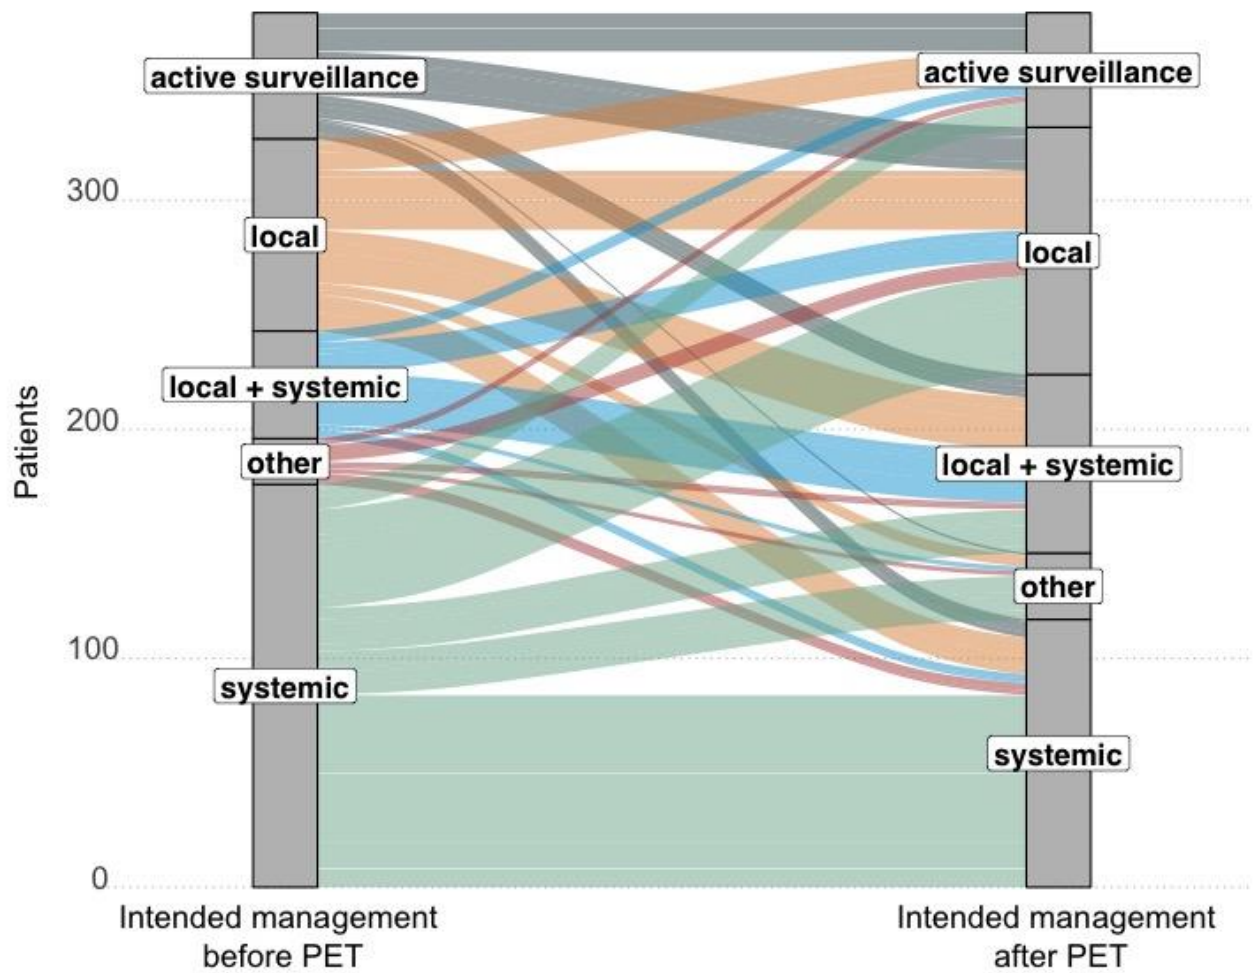

Supplement: 242180_Supplemental_Data.pdf [file 242180_Supplemental_Data.pdf]
